# Supplementary figures and images for: Speciation in the aqueous H+/H2VO4−/H2O2/picolinate system relevant to diabetes research
Source: Royal Society of Chemistry journal article supplement (doi:10.1039/b313424e), 2004-01-01

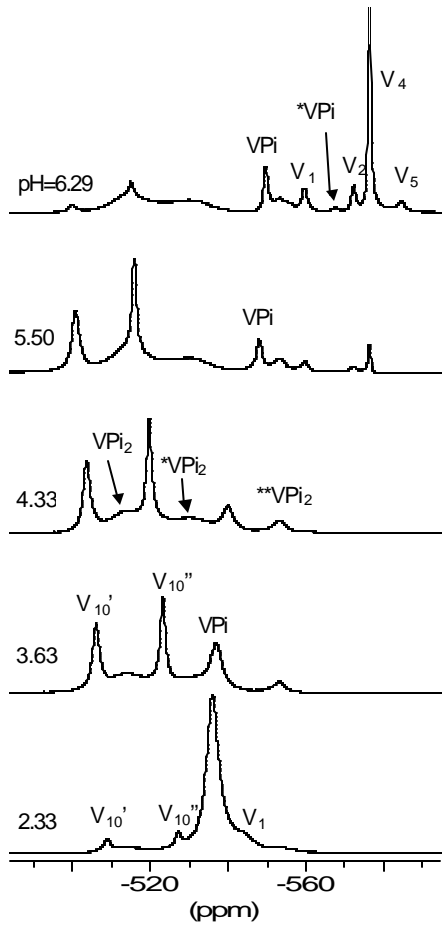

Supplement: b313424e-fs1.pdf [file b313424e-fs1.pdf]

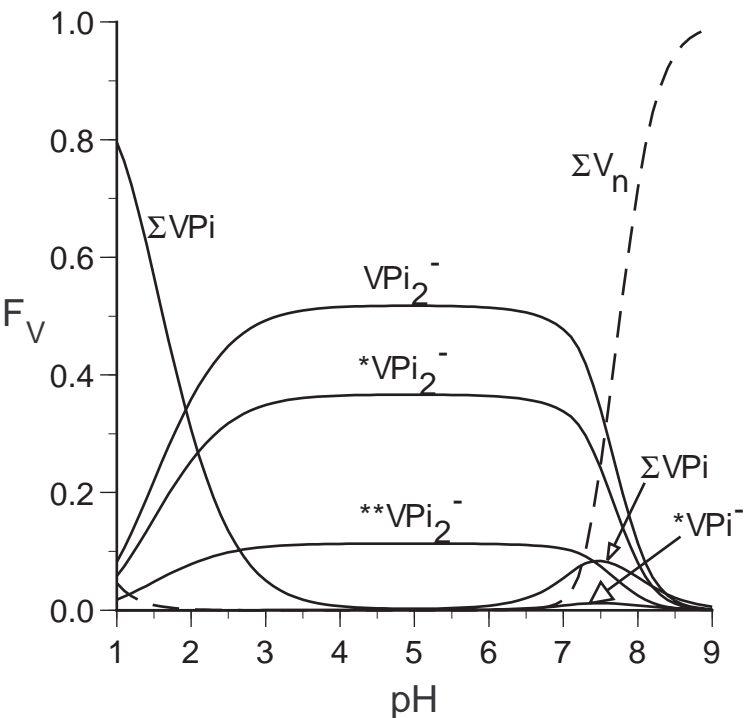

Supplement: b313424e-fs2.pdf [file b313424e-fs2.pdf]
